# Supplementary material for: Crystallographic Structure and Quantum-Chemical Analysis of Biologically Active Co(III)-Pyridoxal–Isothiosemicarbazone Complex
Source: MDPI journal article supplement (doi:10.3390/inorganics11120466), 2023-12-01
Supplement: s1 [file s1]

Supplementary information for:

## Crystallographic Structure and Quantum-Chemical Analysis of Biologically Active Co(III)-Pyridoxal-isothiosemicarbazone Complex

Fahad Abdulaziz <sup>1</sup>, Khulood Fahad Alabbosh <sup>2</sup>, Odeh Abdullah Odeh Alshammari <sup>1</sup>, Wasan Mohammed Bin Tuwalah <sup>1</sup>, Tahani Y. A. Alanazi <sup>1</sup>, Aleksandra Rakić <sup>3</sup>, Miljan Barić <sup>3</sup>, Milica Marković <sup>3</sup>, Violeta Jevtović <sup>1,\*</sup> and Dušan Dimić <sup>3,\*</sup>

<sup>1</sup> Department of Chemistry, College of Science, University of Ha'il, Ha'il 81451, Kingdom of Saudi Arabia; odeh.alshammari@uoh.edu.sa (O.A.O.A.)

<sup>2</sup> Department of Biology, College of Science, University of Ha'il, Ha'il 81451, Kingdom of Saudi Arabia

<sup>3</sup> Faculty of Physical Chemistry, University of Belgrade, Studentski Trg 12-16, 11000 Beograd, Serbia; saska@ffh.bg.ac.rs (A.R.); milica.markovic@ffh.bg.ac.rs (M.M.)

\* Correspondence: v.jevtovic@uoh.edu.sa (V.J.); ddimic@ffh.bg.ac.rs (D.D.)

Table S1. Crystallographic and optimized (at B3LYP/6-31+G(H,C,N,S,O)/LanL2DZ(Co)) bond lengths (in Å) of [Co(PLITSC-2H)(NH<sub>3</sub>)<sub>3</sub>]<sup>+</sup>

| Bond    | Crystallographic | Optimized |
|---------|------------------|-----------|
| Co1-O3  | 1.89             | 1.89      |
| Co1-N7  | 1.87             | 1.89      |
| Co1-N11 | 1.97             | 2.05      |
| Co1-N12 | 1.89             | 1.93      |
| Co1-N15 | 1.97             | 1.99      |
| Co1-N19 | 1.98             | 2.05      |
| S2-C27  | 1.76             | 1.77      |
| S2-C39  | 1.79             | 1.83      |
| O3-C28  | 1.30             | 1.33      |
| O4-H5   | 0.84             | 0.97      |
| O4-C31  | 1.44             | 1.43      |

|         |      |      |
|---------|------|------|
| N11-N6  | 1.39 | 1.38 |
| N6-C27  | 1.33 | 1.33 |
| N7-H8   | 0.91 | 1.02 |
| N7-H9   | 0.91 | 1.02 |
| N7-H10  | 0.91 | 1.02 |
| N11-C23 | 1.29 | 1.30 |
| N12-H13 | 0.88 | 1.01 |
| N12-C27 | 1.32 | 1.34 |
| N14-C29 | 1.36 | 1.35 |
| N14-C34 | 1.32 | 1.33 |
| N15-H16 | 0.91 | 1.02 |
| N15-H17 | 0.91 | 1.02 |
| N15-H18 | 0.91 | 1.02 |
| N19-H20 | 0.91 | 1.02 |
| N19-H21 | 0.91 | 1.02 |
| N19-H22 | 0.91 | 1.02 |
| C23-H24 | 0.95 | 1.09 |
| C23-C25 | 1.44 | 1.45 |
| C25-C26 | 1.41 | 1.43 |
| C25-C28 | 1.42 | 1.42 |
| C26-C29 | 1.38 | 1.39 |
| C31-C26 | 1.51 | 1.51 |
| C28-C34 | 1.43 | 1.43 |
| C29-H30 | 0.95 | 1.09 |
| C31-H32 | 0.99 | 1.10 |
| C31-H33 | 0.99 | 1.10 |
| C34-C35 | 1.49 | 1.50 |
| C35-H36 | 0.98 | 1.10 |
| C35-H37 | 0.98 | 1.10 |
| C35-H38 | 0.98 | 1.09 |
| C39-H40 | 0.98 | 1.09 |
| C39-H41 | 0.98 | 1.09 |
| C39-H42 | 0.98 | 1.09 |
| C34-C28 | 1.43 | 1.43 |

Table S2. Crystallographic and optimized (at B3LYP/6-31+G(H,C,N,S,O)/LanL2DZ(Co)) bond angles (in °) of [Co(PLITSC-2H)(NH<sub>3</sub>)<sub>3</sub>]<sup>+</sup>

| Angles optimized structure | Angles (°) | Angles (°) |
|----------------------------|------------|------------|
| A(3,1,6)                   | 89.1       | 88.5       |

|             |       |       |
|-------------|-------|-------|
| A(3,1,7)    | 95.7  | 96.1  |
| A(3,1,10)   | 90.4  | 89.4  |
| A(3,1,11)   | 87.3  | 84.2  |
| A(6,1,7)    | 91.3  | 89.0  |
| A(6,1,8)    | 89.1  | 90.7  |
| A(6,1,11)   | 90.2  | 91.1  |
| A(7,1,8)    | 82.2  | 82.2  |
| A(7,1,10)   | 89.7  | 88.8  |
| A(8,1,10)   | 91.8  | 91.3  |
| A(8,1,11)   | 94.9  | 97.5  |
| A(10,1,11)  | 88.8  | 91.1  |
| A(15,2,21)  | 102.8 | 102.7 |
| A(1,3,16)   | 124.4 | 125.5 |
| A(18,4,22)  | 109.5 | 109.2 |
| A(7,5,15)   | 108.2 | 110.6 |
| A(1,6,23)   | 109.4 | 113.8 |
| A(1,6,24)   | 109.5 | 109.4 |
| A(1,6,25)   | 109.4 | 109.1 |
| A(23,6,24)  | 109.5 | 106.9 |
| A(23,6,25)  | 109.5 | 109.9 |
| A(24,6,25)  | 109.5 | 107.6 |
| A(1,7,5)    | 116.3 | 115.7 |
| A(1,7,12)   | 126.5 | 125.2 |
| A(5,7,12)   | 117.1 | 119.1 |
| A(1,8,15)   | 111.0 | 110.2 |
| A(1,8,26)   | 124.5 | 131.2 |
| A(15,8,26)  | 124.5 | 118.6 |
| A(17,9,19)  | 120.3 | 119.7 |
| A(1,10,27)  | 109.4 | 109.3 |
| A(1,10,28)  | 109.5 | 112.3 |
| A(1,10,29)  | 109.4 | 111.0 |
| A(27,10,28) | 109.6 | 107.0 |
| A(27,10,29) | 109.5 | 107.1 |
| A(28,10,29) | 109.5 | 109.9 |
| A(1,11,30)  | 109.5 | 102.6 |
| A(1,11,31)  | 109.5 | 115.7 |
| A(1,11,32)  | 109.5 | 116.0 |
| A(30,11,31) | 109.4 | 107.9 |
| A(30,11,32) | 109.5 | 107.9 |
| A(31,11,32) | 109.5 | 106.3 |
| A(7,12,13)  | 124.0 | 125.6 |

|             |       |       |
|-------------|-------|-------|
| A(7,12,33)  | 118.0 | 115.4 |
| A(13,12,33) | 118.0 | 119.0 |
| A(12,13,14) | 119.0 | 119.0 |
| A(12,13,16) | 122.2 | 122.8 |
| A(14,13,16) | 118.8 | 118.2 |
| A(13,14,17) | 119.0 | 118.0 |
| A(13,14,18) | 121.6 | 122.6 |
| A(17,14,18) | 119.2 | 119.4 |
| A(2,15,5)   | 112.4 | 113.3 |
| A(2,15,8)   | 125.5 | 125.5 |
| A(5,15,8)   | 122.1 | 121.2 |
| A(3,16,13)  | 126.2 | 124.5 |
| A(3,16,19)  | 116.3 | 117.1 |
| A(13,16,19) | 117.5 | 118.5 |
| A(9,17,14)  | 122.4 | 123.9 |
| A(9,17,34)  | 118.8 | 115.8 |
| A(14,17,34) | 118.8 | 120.3 |
| A(4,18,14)  | 108.5 | 109.0 |
| A(4,18,35)  | 110.0 | 110.1 |
| A(4,18,36)  | 110.0 | 110.9 |
| A(14,18,35) | 110.0 | 110.6 |
| A(14,18,36) | 110.0 | 108.7 |
| A(35,18,36) | 108.4 | 107.5 |
| A(9,19,16)  | 121.8 | 121.8 |
| A(9,19,20)  | 118.7 | 118.1 |
| A(16,19,20) | 119.5 | 120.1 |
| A(19,20,37) | 109.5 | 111.4 |
| A(19,20,38) | 109.5 | 111.4 |
| A(19,20,39) | 109.5 | 109.1 |
| A(37,20,38) | 109.5 | 107.0 |
| A(37,20,39) | 109.5 | 108.9 |
| A(38,20,39) | 109.4 | 109.0 |
| A(2,21,40)  | 109.5 | 112.1 |
| A(2,21,41)  | 109.5 | 104.9 |
| A(2,21,42)  | 109.5 | 112.1 |
| A(40,21,41) | 109.4 | 108.1 |
| A(40,21,42) | 109.5 | 111.2 |
| A(41,21,42) | 109.5 | 108.1 |

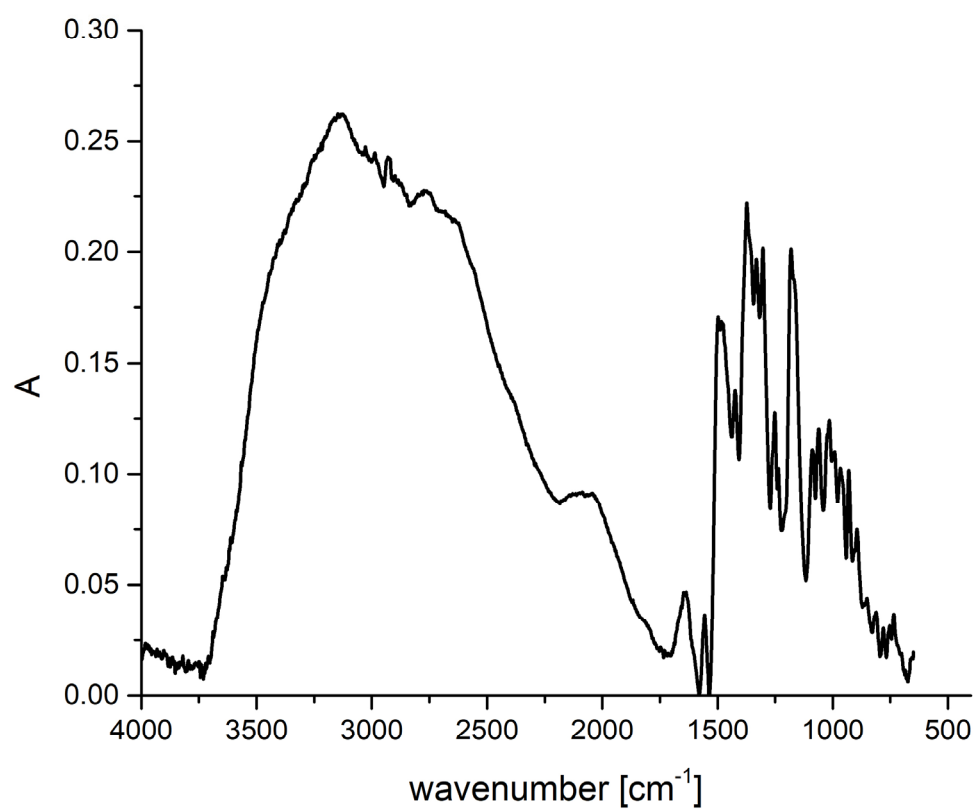

Figure S1. IR spectrum of **1**.

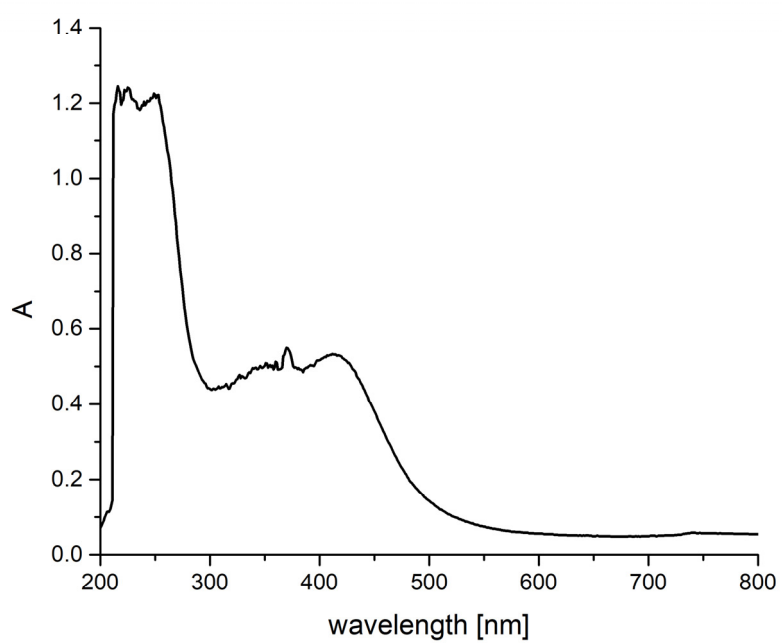

Figure S2. UV-VIS spectrum of **1**.

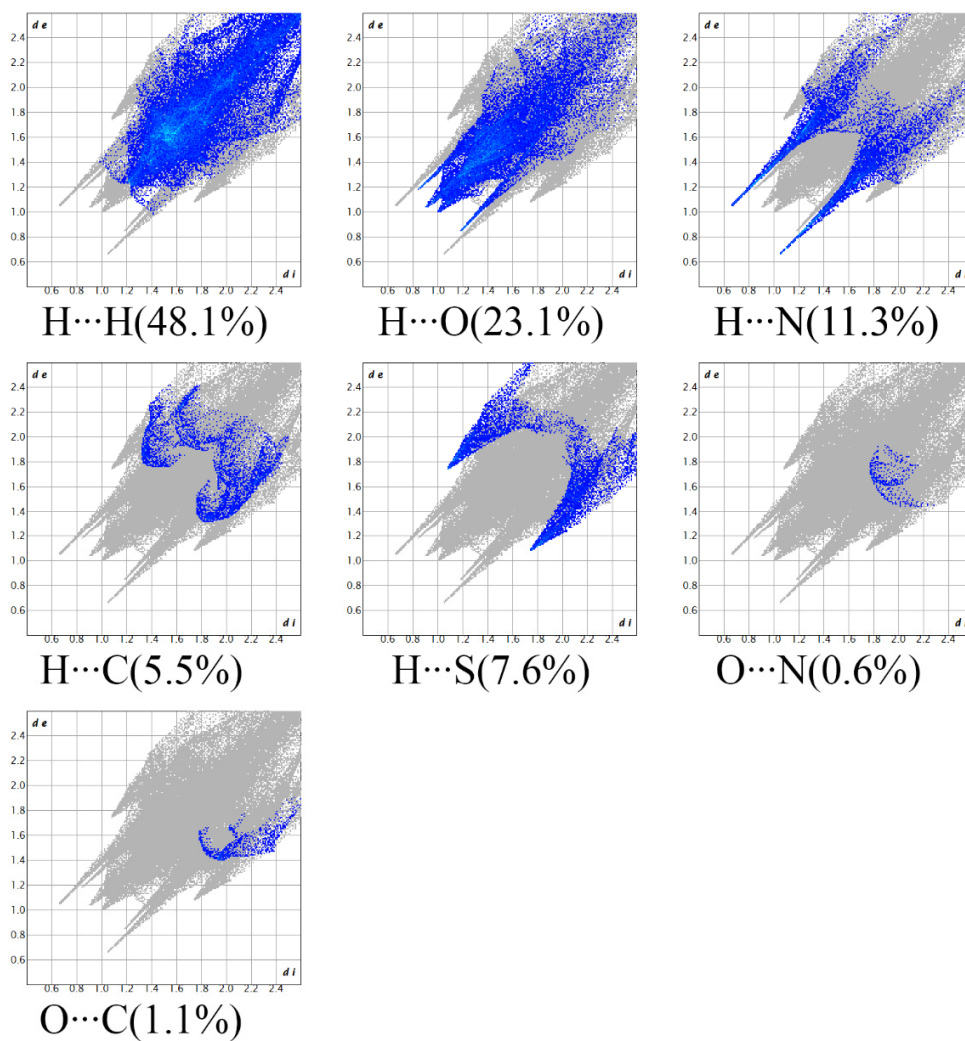

Figure S3. The fingerprint plots for the most important interactions within crystal structure of **1**.
